# Supplementary material for: Physical workload is associated with increased risk of rheumatoid arthritis: results from a Swedish population-based case–control study
Source: PubMed Central journal article supplement — RMD Open. 2017 Mar 14;3(1):e000324. doi: 10.1136/rmdopen-2016-000324 (PMC5353304; doi:10.1136/rmdopen-2016-000324), 2017-03-14
Supplement: rmdopen-2016-000324supp.pdf [file rmdopen-2016-000324supp.pdf]

## Questionnaire: Work-related Physical Stress

1. Does your work require you to bend over or turn in a repetitive manner several times per hour?

Currently:

1. *never or rarely*
2. *1-3 days/month*
3. *1 day/week*
4. *2-4 days/week*
5. *every working day*
6. *not working*

Five years ago:

1. *never or rarely*
2. *1-3 days/month*
3. *1 day/week*
4. *2-4 days/week*
5. *every working day*
6. *not working*

2. Does your work involve performing repetitive hand- or finger-movements several times per minute? (for example, typing or sorting)

Currently:

1. *never or rarely*
2. *1-3 days/month*
3. *1 day/week*
4. *2-4 days/week*
5. *every working day*
6. *not working*

Five years ago:

1. *never or rarely*
2. *1-3 days/month*
3. *1 day/week*
4. *2-4 days/week*
5. *every working day*
6. *not working*

3. Do/did you lift or carry objects heavier than 10 kg?

Currently:

1. *never or rarely*
2. *1-3 days/month*
3. *1 day/week*
4. *2-4 days/week*
5. *every working day*
6. *not working*

Five years ago:

1. *never or rarely*
2. *1-3 days/month*
3. *1 day/week*
4. *2-4 days/week*
5. *every working day*
6. *not working*

4. Does your work require you to perform precision work for more than a total of two hours per day? (for example, fine mechanics, clock-making or dental work)

Currently:

1. *never or rarely*
2. *1-3 days/month*
3. *1 day/week*
4. *2-4 days/week*
5. *every working day*
6. *not working*

Five years ago:

1. *never or rarely*
2. *1-3 days/month*
3. *1 day/week*
4. *2-4 days/week*
5. *every working day*
6. *not working*

5. Does your work involve movements where your hands are placed below knee level for more than a total of 30 minutes per day? (for example, floor or ground work)

Currently:

1. *never or rarely*
2. *1-3 days/month*
3. *1 day/week*
4. *2-4 days/week*
5. *every working day*
6. *not working*

Five years ago:

1. *never or rarely*
2. *1-3 days/month*
3. *1 day/week*
4. *2-4 days/week*
5. *every working day*
6. *not working*

6. Do/did you perform work where your hands are/were placed above shoulder level for more than a total of 30 minutes per day?

Currently:

1. *never or rarely*
2. *1-3 days/month*
3. *1 day/week*
4. *2-4 days/week*
5. *every working day*
6. *not working*

Five years ago:

1. *never or rarely*
2. *1-3 days/month*
3. *1 day/week*
4. *2-4 days/week*
5. *every working day*
6. *not working*

7. What proportion of your working day do you work on a vibrating floor or seat? (for example, in a car, boat, aeroplane, tractor, or lorry)

Currently:

1. *not at all*
2. *1/4 time*
3. *1/2 time*
4. *3/4 time*
5. *full-time*
6. *not working*

Five years ago:

1. *not at all*
2. *1/4 time*
3. *1/2 time*
4. *3/4 time*
5. *full-time*
6. *not working*

8. What proportion of your working day do/did you work using vibrating hand-held machines? (for example, power drill, sander, nail gun, chainsaw, levers, steering wheels, etc.)

Currently:

1. *not at all*
2. *1/4 time*
3. *1/2 time*
4. *3/4 time*
5. *full-time*
6. *not working*

Five years ago:

1. *not at all*
2. *1/4 time*
3. *1/2 time*
4. *3/4 time*
5. *full-time*
6. *not working*

**Supplementary Table S1:** Occupation categories of those who were exposed to all 7 types of physical workload 5 years before baseline\*

---

|                                            | <b>Frequency</b> | <b>Percentage</b> |
|--------------------------------------------|------------------|-------------------|
| metal machine work and building metal work | 21               | 14.38             |
| electrical and electronics work            | 19               | 13.01             |
| other building and construction work       | 18               | 12.33             |
| caretaking and cleaning work               | 9                | 6.16              |
| lodging and catering service work          | 8                | 5.48              |

---

\*Only the 5 most frequent occupations are shown.

**Supplementary Table S2** : Adjusted odds ratios for the association of physical workload and development of RA

| Physical Workloads                   |           | Cases/<br>Controls | 5 Years Before Baseline    |                            |                            |                            |                            |                            |                            |                            |
|--------------------------------------|-----------|--------------------|----------------------------|----------------------------|----------------------------|----------------------------|----------------------------|----------------------------|----------------------------|----------------------------|
|                                      |           |                    | OR <sup>1</sup><br>(95%CI) | OR <sup>2</sup><br>(95%CI) | OR <sup>3</sup><br>(95%CI) | OR <sup>4</sup><br>(95%CI) | OR <sup>5</sup><br>(95%CI) | OR <sup>6</sup><br>(95%CI) | OR <sup>7</sup><br>(95%CI) | OR <sup>8</sup><br>(95%CI) |
| repetitive<br>bending/turning        | unexposed | 963/2039           | 1.0(ref.)                  |
|                                      | exposed   | 1925/2531          | 1.6(1.5-1.8)               | 1.6(1.5-1.8)               | 1.5(1.4-1.7)               | 1.5(1.3-1.7)               | 1.6(1.4-1.7)               | 1.5(1.4-1.7)               | 1.5(1.4-1.7)               | 1.6(1.5-1.8)               |
| repetitive hand/<br>finger movements | unexposed | 824/1546           | 1.0(ref.)                  |
|                                      | exposed   | 2060/3020          | 1.3(1.2-1.4)               | 1.3(1.2-1.4)               | 1.2(1.1-1.4)               | 1.3(1.2-1.5)               | 1.3(1.2-1.4)               | 1.3(1.1-1.4)               | 1.3(1.2-1.5)               | 1.3(1.1-1.4)               |
| lift or carry<br>more than 10 kg     | unexposed | 1284/2496          | 1.0(ref.)                  |
|                                      | exposed   | 1602/2077          | 1.5(1.4-1.7)               | 1.5(1.4-1.7)               | 1.5(1.3-1.6)               | 1.5(1.3-1.6)               | 1.5(1.4-1.7)               | 1.5(1.3-1.6)               | 1.5(1.4-1.7)               | 1.5(1.4-1.7)               |
| precision work                       | unexposed | 2536/4061          | 1.0(ref.)                  |
|                                      | exposed   | 344/487            | 1.1(1.0-1.3)               | 1.1(1.0-1.3)               | 1.1(1.0-1.3)               | 1.1(0.9-1.3)               | 1.1(1.0-1.3)               | 1.1(1.0-1.3)               | 1.1(1.0-1.3)               | 1.2(1.0-1.3)               |
| hands below<br>knee level            | unexposed | 2215/3827          | 1.0(ref.)                  |
|                                      | exposed   | 668/736            | 1.6(1.4-1.8)               | 1.6(1.4-1.8)               | 1.5(1.3-1.7)               | 1.5(1.3-1.7)               | 1.5(1.4-1.7)               | 1.5(1.3-1.7)               | 1.6(1.4-1.8)               | 1.6(1.3-1.8)               |
| hands above<br>shoulder level        | unexposed | 2028/3675          | 1.0(ref.)                  |
|                                      | exposed   | 857/893            | 1.8(1.6-2.0)               | 1.8(1.6-2.0)               | 1.7(1.5-1.9)               | 1.7(1.5-1.9)               | 1.7(1.5-1.9)               | 1.7(1.5-1.9)               | 1.7(1.5-1.9)               | 1.7(1.6-1.9)               |
| vibration                            | unexposed | 2353/3927          | 1.0(ref.)                  |
|                                      | exposed   | 535/634            | 1.5(1.3-1.8)               | 1.5(1.3-1.8)               | 1.4(1.2-1.6)               | 1.5(1.3-1.7)               | 1.5(1.3-1.7)               | 1.4(1.3-1.7)               | 1.5(1.3-1.8)               | 1.5(1.3-1.7)               |

1 OR adjusted for age (10 strata), residential area and sex.

2 OR adjusted for age (10 strata), residential area, sex and BMI.

3 OR adjusted for age (10 strata), residential area, sex and university degree.

4 OR adjusted for age (10 strata), residential area, sex and alcohol (non-drinkers, low, moderate, high).

5 OR adjusted for age (10 strata), residential area, sex and smoke (ever/never)

6 OR adjusted for age (10 strata), residential area, sex and smoke (pack-years)

7 OR adjusted for age (10 strata), residential area, sex and time period.

8 OR adjusted for age (10 strata), residential area, sex and silica exposure.

Baseline is the year when the subjects were diagnosed with rheumatoid arthritis. RA=rheumatoid arthritis; OR=odd ratio;

95% CI= 95% confidence interval; ref. =reference

**Supplementary Table S3** Association of different types of prolonged repetitive physical workload and risk of rheumatoid arthritis stratified by educational level

| Type of Physical Workloads       |           | Junior High School and Vocational School |               | Senior High School |               | University     |               |
|----------------------------------|-----------|------------------------------------------|---------------|--------------------|---------------|----------------|---------------|
|                                  |           | cases/controls                           | OR(95%CI)     | cases/controls     | OR(95%CI)     | cases/controls | OR(95%CI)     |
| repetitive bending/turning       | unexposed | 251/395                                  | 1.0(ref)      | 276/619            | 1.0(ref)      | 396/977        | 1.0(ref)      |
|                                  | exposed   | 903/1007                                 | 1.4 (1.2-1.7) | 581/821            | 1.6 (1.3-1.9) | 357/604        | 1.4 (1.2-1.7) |
| repetitive hand/finger movements | unexposed | 306/441                                  | 1.0(ref)      | 231/438            | 1.0(ref)      | 238/614        | 1.0(ref)      |
|                                  | exposed   | 847/958                                  | 1.3 (1.1-1.5) | 622/1003           | 1.2 (1.0-1.4) | 515/965        | 1.4 (1.1-1.7) |
| lift or carry more than 10 kg    | unexposed | 418/592                                  | 1.0(ref)      | 342/732            | 1.0(ref)      | 469/1105       | 1.0(ref)      |
|                                  | exposed   | 734/809                                  | 1.3 (1.1-1.5) | 516/713            | 1.6 (1.3-1.9) | 283/477        | 1.4 (1.2-1.7) |
| precision work                   | unexposed | 1026/1232                                | 1.0(ref)      | 743/1277           | 1.0(ref)      | 661/1438       | 1.0(ref)      |
|                                  | exposed   | 126/156                                  | 1.0 (0.7-1.2) | 110/158            | 1.2 (0.9-1.6) | 90/143         | 1.4 (1.1-1.9) |
| hands below knee level           | unexposed | 787/1029                                 | 1.0(ref)      | 668/1203           | 1.0(ref)      | 667/1480       | 1.0(ref)      |
|                                  | exposed   | 367/368                                  | 1.4 (1.1-1.6) | 185/236            | 1.4 (1.1-1.8) | 85/102         | 1.9 (1.4-2.5) |
| hands above shoulder level       | unexposed | 701/970                                  | 1.0(ref)      | 595/1150           | 1.0(ref)      | 642/1450       | 1.0(ref)      |
|                                  | exposed   | 450/428                                  | 1.5 (1.3-1.8) | 263/292            | 1.8 (1.4-2.2) | 110/133        | 1.8 (1.4-2.4) |
| vibration                        | unexposed | 841/1066                                 | 1.0(ref)      | 712/1235           | 1.0(ref)      | 692/1509       | 1.0(ref)      |
|                                  | exposed   | 314/331                                  | 1.3 (1.0-1.6) | 144/202            | 1.2 (1.0-1.6) | 61/73          | 2.0 (1.4-2.9) |

These are exposures reported for 5 years before baseline.

All odds ratios are adjusted for age (10 strata), sex, and residential area.

**Supplementary Table S4** Association of different types of prolonged repetitive physical workload and risk of rheumatoid arthritis stratified by occupational classes

|                                  |           | Manual Workers |               | Non-manual Employees |               |
|----------------------------------|-----------|----------------|---------------|----------------------|---------------|
|                                  |           | cases/controls | OR (95%CI)    | cases/controls       | OR (95%CI)    |
| repetitive bending/turning       | unexposed | 204/292        | 1.0 (ref.)    | 694/1623             | 1.0 (ref.)    |
|                                  | exposed   | 922/1083       | 1.2 (1.0-1.5) | 858/1190             | 1.6 (1.4-1.8) |
| repetitive hand/finger movements | unexposed | 388/601        | 1.0 (ref.)    | 363/818              | 1.0 (ref.)    |
|                                  | exposed   | 736/772        | 1.4 (1.2-1.7) | 1187/1994            | 1.4 (1.2-1.6) |
| lift or carry more than 10kg     | unexposed | 233/329        | 1.0 (ref.)    | 993/2007             | 1.0 (ref.)    |
|                                  | exposed   | 893/1046       | 1.2 (1.0-1.5) | 558/807              | 1.4 (1.2-1.6) |
| precision work                   | unexposed | 943/1142       | 1.0 (ref.)    | 1415/2597            | 1.0 (ref.)    |
|                                  | exposed   | 177/220        | 0.9 (0.7-1.1) | 135/217              | 1.1 (0.9-1.4) |
| hands below knee level           | unexposed | 654/899        | 1.0 (ref.)    | 1410/2640            | 1.0 (ref.)    |
|                                  | exposed   | 467/473        | 1.3 (1.1-1.5) | 141/171              | 1.6 (1.2-2.0) |
| hands above shoulder level       | unexposed | 573/850        | 1.0 (ref.)    | 1320/2554            | 1.0 (ref.)    |
|                                  | exposed   | 549/522        | 1.6 (1.3-1.9) | 232/259              | 1.7 (1.4-2.1) |
| vibration                        | unexposed | 763/979        | 1.0 (ref.)    | 1431/2664            | 1.0 (ref.)    |
|                                  | exposed   | 361/389        | 1.2 (0.9-1.4) | 121/149              | 1.7 (1.3-2.3) |

These are exposures reported for 5 years before baseline.

All odds ratios are adjusted for age (10 strata), sex, and residential area.

**Supplementary Table S5:** Adjusted odds ratios for the association of prolonged repetitive physical workload and development of RA

| Exposure*                       | Potential Confounding Factors          |                                             |                                          |                            |                                    |                                  |                       |
|---------------------------------|----------------------------------------|---------------------------------------------|------------------------------------------|----------------------------|------------------------------------|----------------------------------|-----------------------|
|                                 | Repetitive bending/turning OR* (95%CI) | Repetitive hand/finger movement OR* (95%CI) | Lift or carry More than 10kg OR* (95%CI) | Precision Work OR* (95%CI) | Hands below Knee level OR* (95%CI) | Hands above Shoulder OR* (95%CI) | Vibration OR* (95%CI) |
| Repetitive bending/turning      |                                        | 1.6(1.4-1.7)                                | 1.5(1.3-1.6)                             | 1.6(1.5-1.8)               | 1.5(1.4-1.7)                       | 1.4(1.3-1.6)                     | 1.5(1.4-1.7)          |
| Repetitive hand/finger movement | 1.2(1.0-1.3)                           |                                             | 1.3(1.2-1.5)                             | 1.3(1.2-1.4)               | 1.3(1.2-1.4)                       | 1.2(1.1-1.4)                     | 1.3(1.1-1.4)          |
| Lift or carry More than 10kg    | 1.4(1.2-1.5)                           | 1.6(1.4-1.7)                                |                                          | 1.5(1.4-1.7)               | 1.4(1.3-1.6)                       | 1.3(1.2-1.5)                     | 1.5(1.3-1.6)          |
| Precision work                  | 1.0(0.9-1.2)                           | 1.1(0.9-1.3)                                | 1.0(0.9-1.2)                             |                            | 1.0(0.9-1.2)                       | 1.0(0.9-1.2)                     | 1.0(0.8-1.1)          |
| Hands below Knee level          | 1.4(1.2-1.6)                           | 1.6(1.4-1.8)                                | 1.4(1.2-1.6)                             | 1.6(1.4-1.8)               |                                    | 1.2(1.1-1.4)                     | 1.5(1.3-1.7)          |
| Hands above shoulder            | 1.6(1.4-1.8)                           | 1.8(1.6-2.0)                                | 1.6(1.4-1.8)                             | 1.5(1.3-1.8)               | 1.6(1.4-1.8)                       |                                  | 1.7(1.5-1.9)          |
| vibration                       | 1.3(1.2-1.5)                           | 1.5(1.3-1.8)                                | 1.3(1.2-1.5)                             | 1.8(1.6-2.0)               | 1.3(1.1-1.5)                       | 1.2(1.1-1.4)                     |                       |

\*: These are exposures reported for 5 years before baseline.

All odds ratios are also adjusted for age (10 strata), sex and residential area.

**Supplementary Table S6:** Odds ratios for the association of prolonged repetitive physical workload and development of RA\*

| <b>Types of Physical Workloads</b> | <b>5 Years Before Baseline</b> |
|------------------------------------|--------------------------------|
|                                    | <b>OR* (95%CI)</b>             |
| repetitive bending/turning         | 1.3 (1.1-1.4)                  |
| repetitive hand/finger movements   | 1.2 (1.1-1.4)                  |
| lift or carry more than 10kg       | 1.3 (1.1-1.4)                  |
| precision work                     | 0.9 (0.7-1.0)                  |
| hands below knee level             | 1.1 (1.0-1.3)                  |
| hands above shoulder level         | 1.4 (1.2-1.6)                  |
| vibration                          | 1.1 (0.9-1.3)                  |

These are exposures 5 years before baseline.

\*The odds ratios are obtained after all types of physical workload were included simultaneously in the statistical model together with age (10 strata), sex and residential area.
